# Supplementary material for: Characterizing CD38 Expression and Enzymatic Activity in the Brain of Spontaneously Hypertensive Stroke-Prone Rats
Source: Frontiers journal article supplement (doi:10.3389/fphar.2022.881708), 2022-05-31
Supplement: Data_Sheet_1.PDF [file Data_Sheet_1.PDF]

**Supplementary Table 1:** List of antibodies and chemicals in addition to their sources and concentrations that were used in our experiments:

| <b>Antibody/Chemical</b>                                                                                      | <b>Company Source</b>     | <b>Concentration /Amount</b>                           | <b>Company Catalogue Number</b> |
|---------------------------------------------------------------------------------------------------------------|---------------------------|--------------------------------------------------------|---------------------------------|
| CD68                                                                                                          | Abcam                     | 1:200                                                  | ab125212                        |
| CD3                                                                                                           | Abcam                     | 1:200                                                  | ab16669                         |
| GFAP                                                                                                          | Abcam                     | 1:200                                                  | ab7260                          |
| NeuN (neuronal marker)                                                                                        | Abcam                     | 1:200                                                  | ab104225                        |
| Iba1                                                                                                          | FUJIFILM Wako Chemicals   | 1:200                                                  | 019-19741                       |
| CD38                                                                                                          | Santa Cruz                | 1:25 in immunohistochemistry<br>1:100 Western Blotting | sc-374650                       |
| nNOS                                                                                                          | Cell Signaling            | 1:200                                                  | 4231S                           |
| MPO                                                                                                           | Abcam                     | 1:200                                                  | Ab208670                        |
| eNOS                                                                                                          | Invitrogen                | 1:100                                                  | PA1-037                         |
| iNOS                                                                                                          | Invitrogen                | 1:50                                                   | PA1-036                         |
| GAPDH                                                                                                         | Cell Signaling Technology | 1:2000                                                 | 2118                            |
| Anti-mouse IgG, HRP-linked antibody                                                                           | Cell Signaling Technology | 1:5000                                                 | 7076                            |
| Normal mouse IgG                                                                                              | Santa Cruz                | 1:25                                                   | Sc-2025                         |
| Goat anti-Mouse IgG (H+L) Cross-Adsorbed Secondary Antibody, Alexa Fluor 594                                  | Invitrogen                | 1:500                                                  | A-11005                         |
| Goat anti-Rabbit IgG (H+L) Cross-Adsorbed Secondary Antibody, Alexa Fluor 488                                 | Invitrogen                | 1:500                                                  | A-11008                         |
| DHE stain<br>Dihydroethidium                                                                                  | Sigma-Aldrich             | 10 uM                                                  | 104821-25-2                     |
| DAF-FM stain<br>4-Amino-5-methylamino-2',7'-difluorofluorescein diacetate,<br>Diaminofluorescein-FM diacetate | Chemodex Ltd.             | 10 uM                                                  | 254109-22-3                     |
| Cell Meter™ Intracellular NADH/NADPH Fluorescence Imaging Kit                                                 | AAT Bioquest, Inc.        | 1:250                                                  | 15290                           |

**Supplementary Figure 1 legend:**

Supplementary figure 1 shows the specificity of CD38 antibody that was used in the immunohistochemistry experiment in both WKY and SHRSP with positive red staining. Matched experiments with normal mouse IgG control show negative staining. Red: CD38 staining, Blue: DAPI: 4',6-diamidino-2-phenylindole; SHRSP: spontaneously hypertensive stroke-prone rat; WKY: Wistar Kyoto Rat.

**Supplementary Figure 2 legend:**

Supplementary figure 2 shows the full western blot results demonstrating CD38 and GAPDH bands. GAPDH was detected at 37kD and CD38 band was detected at 43kD in WKY and SHRSP. SHRSP: spontaneously hypertensive stroke prone rat; WKY: Wistar Kyoto rat.
